1 **Differential reduction of neuropathic pain symptoms by**  
2 **mGlu<sub>4</sub>-mediated neuromodulation of amygdala circuits**

3 Vanessa Pereira<sup>1</sup>, Juri Aparicio Arias<sup>1</sup>, Amadeu Llebaria<sup>2</sup>, Cyril Goudet<sup>1</sup>✉

4

5 <sup>1</sup> IGF, Univ. Montpellier, CNRS, INSERM, Montpellier, France

6 <sup>2</sup> MCS, Laboratory of Medicinal Chemistry & Synthesis, Department of Biological Chemistry,  
7 Institute for Advanced Chemistry of Catalonia (IQAC-CSIC), Barcelona, Spain

8

9 **Corresponding author:**

10 Cyril Goudet (ORCID: 0000-0002-8255-3535)

11 Email: [cyril.goudet@igf.cnrs.fr](mailto:cyril.goudet@igf.cnrs.fr)

12

13 **Keywords**

14 Pain, Amygdala, GPCR, Photopharmacology, metabotropic glutamate receptors,

15

16

17 **ABSTRACT**

18 Neuropathic pain is a common health problem, resulting in exacerbated response to noxious  
19 and non noxious stimuli, as well as impaired emotional and cognitive responses. Unfortunately,  
20 neuropathic pain is also one of the most difficult pain syndromes to manage, highlighting the  
21 importance of better understanding of the brain regions and neuromodulatory mechanisms  
22 involved in its regulation. Among the many interconnected brain areas which process pain, the  
23 amygdala is known to play an important role in the integration of sensory and emotional pain  
24 signals. Here, we questioned the ability of a recently identified neuromodulatory mechanisms  
25 associated to the metabotropic glutamate receptors mGlu<sub>4</sub> in the amygdala to modulate  
26 neuropathic pain. In a murine model of peripheral mononeuropathy induced by a chronic  
27 constriction of the sciatic nerve, we demonstrate that pharmacological activation of amygdala  
28 mGlu<sub>4</sub> receptors efficiently alleviates sensory and depressive-like symptoms in both male and  
29 female mice. Moreover, we reveal a differential modulation of those symptoms, activating  
30 mGlu<sub>4</sub> receptors in the controlateral amygdala, relatively to the side of the mononeuropathy, is  
31 necessary and sufficient to relieve both sensory and depressive-like symptoms while ipsilateral  
32 activation solely reduces depressive-like symptoms. Furthermore, using photopharmacology,  
33 a recent strategy allowing a precise spatiotemporal photocontrol of deep brain endogenous  
34 targets, we further demonstrate the rapid and reversible action of mGlu<sub>4</sub>-mediated  
35 neuromodulation on neuropathic pain symptoms. Finally, coupling photopharmacology and  
36 analgesic conditioned place preference, we show an important pain-reducing effect of mGlu<sub>4</sub>  
37 activation. Taken together, these data highlight the analgesic potential of enhancing amygdala  
38 mGlu<sub>4</sub> activity to counteract neuropathy in the hope of improving existing treatments.

## 39 INTRODUCTION

40 Neuropathic pain is caused by a lesion or disease of the somatosensory nervous system. It is  
41 a common and complex health problem, which greatly impairs the quality of life of 7-10% of  
42 the population worldwide (1, 2). Unfortunately, neuropathic pain is one of the most difficult pain  
43 syndromes to manage (3), underlining the importance of understanding the brain circuits and  
44 neuromodulatory mechanisms of pain with the hope to improve treatments.

45 The processing of pain-related information behind the sensory, cognitive and emotional–  
46 affective aspects of pain is very complex and involves many interconnected brain areas  
47 working together (4). Among them, the amygdala is known to be a critical region that integrates  
48 sensory and pain signals (5). The amygdala receives pain-related information mainly from the  
49 thalamus, cortical areas and the parabrachial nucleus (5-7). The amygdala is composed of  
50 multiple interconnected nuclei, comprising the basolateral (BLA) and central (CeA) nuclei and  
51 the intercalated cells (ITC), which have all been linked to pain-related functions. Within  
52 amygdala, various neuromodulatory systems are implicated in the modulation of those  
53 functions, such as opioids (8), cannabinoids (9, 10), neuropeptides (8, 11), as well as  
54 glutamate (12-14).

55 Glutamate is one of the main neurotransmitters involved in the transmission of pain-related  
56 information throughout the nervous system. It exerts its action via the activation of ionotropic  
57 and metabotropic receptors. Metabotropic glutamate receptors (mGlu) are G protein-coupled  
58 receptors activated by the neurotransmitter glutamate (15) and several studies have  
59 highlighted the analgesic potential of these receptors (14, 16). Recently, another member of  
60 the mGlu receptors family, the mGlu<sub>4</sub> subtype, has been identified in the amygdala where it  
61 acts as a neuromodulator of sensory and anxiodepressive symptoms associated to persistent  
62 inflammatory pain (17). These receptors are present mainly in presynaptic elements of both  
63 glutamatergic and GABAergic neurons within the LA and BLA, and they downregulate the  
64 transmission coming from the thalamus (17). mGlu<sub>4</sub> receptors could make interesting analgesic  
65 targets against pathological pain because, while leaving acute pain in naïve animals  
66 unchanged, systemic or local administration of mGlu<sub>4</sub> agonists in the spinal cord or the  
67 amygdala alleviates pain in animal models of chronic pain (17-21). However, the role of these  
68 receptors in chronic pain from various etiologies remains to be further explored.

69 In the present study, we questioned the ability of amygdala mGlu<sub>4</sub> receptors to modulate  
70 neuropathic pain. To that aim, we combined classical behavioral pharmacology in a mouse  
71 preclinical model of peripheral mononeuropathy and photopharmacology, a recent strategy  
72 allowing a precise spatiotemporal control of deep brain endogenous targets by light-operated  
73 ligands (22, 23).

## 74 MATERIALS AND METHODS

### 75 *Animals*

76 Experiments were performed on 8- to 12-week-old C57BL/6J male and female mice (Charles  
77 River). Animals were treated in accordance with the European Community Council Directive  
78 2010/63/EU. Experimental protocols were approved by the regional animal welfare committee  
79 (CEEA-LR) with the guidelines of the French Agriculture and Forestry Ministry (D34-172-13).  
80 All efforts were made to minimize animal suffering and to reduce their number according to the  
81 3R principles.

82

### 83 *Stereotaxic implantation of cannulas*

84 Prior to neuropathy induction and behavioral testing, guide cannulas for pharmacology  
85 (PlasticsOne, Roanoke, VA) or hybrid opto/fluidic cannulas for photopharmacology (DORIC  
86 lenses, Quebec, Canada) were implanted unilaterally by stereotaxic surgery on anesthetized  
87 mice. Cannulas were placed over the intermediate capsule of right or left amygdala (-1.34 mm  
88 anteroposterior (AP);  $\pm 2.9$  mm mediolateral (ML); and -4.25 mm dorsoventral (DV)). After 1  
89 week of recovery from the stereotaxic surgery, animals were first subjected to different  
90 behavioral tests to measure their basal locomotor activity, mechanical or thermal sensitivity  
91 and grooming behavior in order to establish a baseline. At the end of the series of behavioral  
92 experiments, brains were post-fixed to check the cannula locations.

93

### 94 *Peripheral mononeuropathy induction*

95 Induction was performed after 1 week of recovery from stereotaxic implantation and baseline  
96 measurements. We used the “Cuff model” of neuropathic pain, known to induce long-lasting  
97 sensory and anxiodepressive symptoms in mice (24). Peripheral mononeuropathy was  
98 induced by the unilateral implantation of a cuff made of a short polyethylene tube (2 mm)  
99 around the main branch of the sciatic nerve of the right or left hind paw of anesthetized mice  
100 (25). Sham surgeries followed the same procedure, but without implantation.

101

### 102 *Behavioral experiments*

103 Mechanical sensitivity was evaluated using the von Frey method. The mechanical force  
104 required to elicit a paw withdrawal response in 50% of animals (in grams) was determined  
105 using the simplified “up-down” Von Frey method (26). Heat sensitivity was measured using the  
106 Hargreaves test. A radiant infrared heat stimulus was focused on the plantar surface of the  
107 hindpaws of mice to determine the time taken (in seconds) to withdraw from the heat stimulus  
108 (27). Depressive-like behavior was assessed using the splash test (28). The duration that mice  
109 spent pursuing grooming behavior after spraying a 10% sucrose solution on their dorsal coat

110 was recorded manually over a total period of 5 min for classical pharmacology and 9 min for  
111 photopharmacology experiments.

112 These behaviors were tested on healthy mice (baseline, before surgery) and on neuropathic  
113 or sham operated mice (>14 days after the surgery, as indicated in the corresponding figures)  
114 after intra-amygdala injection of drugs or their vehicle. Locomotor activity and additional  
115 behaviors were also recorded (**Supplemental Figure 1**).

116

### 117 ***In vivo photopharmacology***

118 *In vivo* photopharmacology was applied in experiments measuring mechanical and heat  
119 allodynia, depressive-like behavior and in analgesic conditioned place preference experiments  
120 in mononeuropathic mice. Experiments were performed on mice stereotaxically implanted with  
121 hybrid opto/fluidic cannulas. Mice were connected *via* a catheter to a minipump and *via* an  
122 optical fiber to a LED source, allowing the local delivery of drugs and light in the amygdala in  
123 freely moving animals. We used a LED light source (DORIC lenses, Quebec, Canada)  
124 combining two wavelengths (UV: 385nm; Green: 505 nm) which are independently controlled  
125 via the LED driver software (Doric Lenses, Quebec, Canada) and connected through a rotary  
126 joint to an optical fiber (fiber diameter: 200  $\mu\text{m}$ , NA = 0.53). Mice were habituated to be  
127 connected daily during one week before the tests. Tests were performed after intra-amygdala  
128 injection of optogluram or vehicle. Mice received 50 ms light pulses at 10 Hz frequency and a  
129 light power of 8.0 mW for 385 nm wavelength and 2.0 mW for 505 nm wavelength. The duration  
130 of light exposure was adapted for each behavioral test. Typically, light application started 15  
131 minutes following injection, when the ligand reaches its maximal effect (as determined in  
132 absence of light).

133

### 134 **Analgesic conditioned place preference (aCPP)**

135 In order to evaluate the analgesic potential of mGlu<sub>4</sub> photocontrol in absence of external  
136 stimuli, we used the aCPP paradigm (29), combined with photopharmacology. The aCPP  
137 apparatus consists in a two-chamber arena presenting different contexts (striped or dotted wall  
138 patterns), which are connected through a central open door. One chamber was defined as the  
139 “violet chamber” and the other one as the “green chamber”. The illumination is automatically  
140 controlled through a video tracking device coupled to the light source controller (EthoVision,  
141 Noldus, Wageningen, Netherlands). When the mouse is detected in the “violet chamber”, it  
142 receives a 385 nm LED illumination in the amygdala through an optic fiber. On the other hand,  
143 when the mouse is in the “green chamber”, it receives a 505 nm LED illumination in the  
144 amygdala. Following a first session of habituation to the arena in absence of treatment, mice  
145 were submitted to 10 conditioning episodes of 5 minutes, twice daily for 5 days. During each

146 conditioning episode, neuropathic or sham operated mice were injected with either vehicle  
147 (PBS) or optogluram (30  $\mu$ M, 500nL in PBS). Fifteen minutes after injection (when drug  
148 reached its maximal effect), mice were placed for 5 minutes in the arena and allowed to move  
149 freely. Mice were first placed alternatively in one or the other chamber. The 6<sup>th</sup> day, the animals  
150 were placed in the center of the arena, receiving no drug or light treatment, and their real-time  
151 place preference was measured during 5 minutes through a video tracking software.

152

### 153 ***Ligands and chemicals***

154 All chemicals were reagent grade (Merck, or Sigma, Germany). Optogluram and LSP4-2022  
155 were synthesized following the experimental procedures previously reported (30, 31).

156

### 157 ***Statistics***

158 All data are reported as mean  $\pm$  standard error of the mean (SEM). Number of mice and  
159 statistical tests that were performed on datasets are indicated in Figure Legends. Data were  
160 analyzed using Prism software (GraphPad, La Jolla, CA, USA) using one-way or two-way  
161 analysis of variance (ANOVA) and the appropriate post-hoc tests for multiple comparisons.  
162 Data were considered significant when  $p < 0.05$ .

163

164

## 165 **RESULTS**

### 166 ***Peripheral mononeuropathy induces mechanical and heat allodynia and depressive-like*** 167 ***symptoms in male and female mice***

168 Along this study, we used a preclinical model of peripheral mononeuropathy, named the “cuff  
169 model”, provoked by the unilateral implantation of a tube enclosing the sciatic nerve. In mice,  
170 this model is known to induce long-lasting sensory symptoms, such as mechanical and heat  
171 allodynia, as well as anxiodepressive-like symptoms, such as a defect in grooming behavior  
172 (24). This model reproduces similar symptoms to those of patients with neuropathic pain who  
173 often suffer from allodynia, a pathological state in which an innocuous stimuli, becomes painful  
174 (3) as well as depression which is one of the most common comorbidities of neuropathic pain  
175 (1).

176 We measured mechanical and thermal sensitivity, as well as grooming behavior before surgery  
177 (Baseline, D0) and two to three weeks after the induction (**Figure 1a**). After 14 days, we  
178 observed a significant decrease in the paw withdrawal threshold on the side of the lesion, as  
179 measured by the Von Frey technique (**Figure 1b, e**). We also observed a significant decrease  
180 of the latency to withdraw the paw from heat source, as measured by the Hargreaves test  
181 (**Figure 1c, f**). This indicates that the chronic constriction of the sciatic nerve provoked by the

182 cuff induces both mechanical and heat allodynia. In addition, mice elicit a significantly reduced  
183 duration of grooming behavior when submitted to the splash test, indicative of depressive-like  
184 behavior (**Figure 1c**).

185

### 186 ***Activation of mGlu<sub>4</sub> in the amygdala relieves neuropathic pain symptoms in male mice***

187 We then questioned the ability of amygdala mGlu<sub>4</sub> to modulate symptoms of  
188 neuropathic pain. To that aim, we first used a selective mGlu<sub>4</sub> agonist, LSP4-2022 (31), that  
189 we injected unilaterally (5 μM, 500 nL in PBS) either in the ipsilateral or controlateral amygdala  
190 as compared to the peripheral mononeuropathy on the right or left hind paw.

191 We first assessed the potential modulation of neuropathic pain symptoms by right or  
192 left amygdala mGlu<sub>4</sub> when the peripheral mononeuropathy is on the left hind paw. Interestingly,  
193 we observed that activation of the right amygdala mGlu<sub>4</sub> significantly reduces mechanical or  
194 heat allodynia whereas activation of left amygdala mGlu<sub>4</sub> does not modify them (**Figures 2a**  
195 **and 2b**). On the other hand, activation of mGlu<sub>4</sub> in both right or left amygdala significantly  
196 restores grooming behaviour in those mice (**Figure 2c**).

197 To verify whether this asymmetrical modulation of allodynia could result from a  
198 specialization of the right amygdala in the modulation of certain pain-related functions as  
199 previously observed (32), we performed a series of mirror experiments in which the peripheral  
200 mononeuropathy is on the right hind paw this time. When the neuropathy is on the right side,  
201 activation of the left amygdala mGlu<sub>4</sub> significantly reduces mechanical or heat allodynia  
202 whereas activation of right amygdala mGlu<sub>4</sub> does not modify them (**Figures 2d and 2e**).  
203 Activation of mGlu<sub>4</sub> in both right or left amygdala significantly restores grooming behaviour in  
204 those mice (**Figure 2f**).

205 This indicates that activation of mGlu<sub>4</sub> in the amygdala controlateral to the lesion is  
206 necessary and sufficient to relieve both sensory and depressive symptoms of peripheral  
207 mononeuropathy in male mice, while activation of mGlu<sub>4</sub> in the ipsilateral amygdala solely  
208 abolishes depressive-like behavior.

209 Another interesting observation is that activation of amygdala mGlu<sub>4</sub> by local injection  
210 of LSP4-2022 does not significantly modify mechanical or heat sensitivity, as well as grooming  
211 behavior, in Sham operated mice (**supplemental figure 2**). As previously reported (17, 19-  
212 21), it seems that mGlu<sub>4</sub> activation solely restores hypersensitivity or abnormal behaviors  
213 associated to pathological states without significantly affecting normal sensitivity or behavior  
214 in healthy mice.

215



216 ***Activation of mGlu<sub>4</sub> in the amygdala also relieves neuropathic pain symptoms in female***  
217 ***mice***

218 Chronic pain exhibits a higher prevalence in women than in men (1). Over the past years,  
219 preclinical studies have highlighted several sexual dimorphism in pain mechanisms (33-35),  
220 notably at the amygdala level (36). Thus, we sought to determine whether amygdala mGlu<sub>4</sub>  
221 activation can also modulate neuropathic pain symptoms in female mice. To that aim, we  
222 assessed the potential modulation of neuropathic pain symptoms following activation of mGlu<sub>4</sub>  
223 by the agonist LSP4-2022 in the right or left amygdala on female mice suffering from peripheral  
224 mononeuropathy in their left hind paw.

225 First, as observed in male mice, the chronic constriction of the sciatic nerve provokes  
226 mechanical and thermal allodynia, as well as depressive-like symptoms in female mice. Then,  
227 following local injection of LSP4-2022, we obtained similar results than in males: i) controlateral  
228 activation is required to significantly diminish mechanical or heat allodynia while ipsilateral  
229 activation does not modify these sensory symptoms (**Figures 3a and 3b**) and ii) either ipsi or  
230 controlateral activation significantly restore grooming behaviour in female mice (**Figure 3c**).

231 This series of experiments demonstrates that activation of amygdala mGlu<sub>4</sub> relieves  
232 neuropathic pain symptoms in both male and female mice.

233

234 ***Photocontrolled-activation of amygdala mGlu<sub>4</sub> dynamically alleviates neuropathic pain***  
235 ***symptoms***

236 Next, we used photopharmacology, an emerging strategy to control the biological activity of  
237 endogenous proteins by light, to assess whether amygdala mGlu<sub>4</sub> can exert a dynamic  
238 modulation of neuropathic pain-related symptoms. This technique allows a precise  
239 spatiotemporal control of deep brain endogenous targets by light-operated ligands (22, 23).

240 To photocontrol amygdala mGlu<sub>4</sub> receptors, we used optogluram, a photoswitchable positive  
241 allosteric modulator (PAM) of mGlu<sub>4</sub> receptors (17, 30). Optogluram possesses an azobenzene  
242 moiety in its scaffold, acting as a chemical switch. Optogluram is active in the dark then, under  
243 illumination with violet light, it isomerizes from its active trans-isomer to its inactive cis-isomer.  
244 Under illumination with green light, it switches back to its trans active isomer (17). Experiments  
245 were performed on mice implanted with hybrid optic-fluidic cannula connected to a minipump  
246 for drug injection and to a LED source through optic fibers for illumination. After a basal  
247 measurement at t<sub>0</sub>, ligand or vehicle were injected unilaterally either in the ipsilateral or  
248 controlateral amygdala as compared to the peripheral mononeuropathy on the left hind paw.  
249 After 15 minutes, the mechanical and heat sensitivity is measured to determine the effect of



250 the treatment on these parameters. Then, from 15 to 45 minutes, we applied 3 successive  
251 cycles of violet/green illumination to deactivate/reactivate optogluram and measured  
252 mechanical or heat sensitivity after each illumination period of 5 minutes.

253 In the dark, neuropathic-induced mechanical or heat allodynia are abolished 15 minutes after  
254 contralateral intra-amygdala microinjection of optogluram (30 $\mu$ M in 500nL of PBS), but not  
255 following ipsilateral injection. As can be seen in **Figure 4a and 4b**, the antiallodynic action of  
256 optogluram is switched off following a 5 minutes illumination with violet light ( $\lambda$ =385nm, 8.0mW,  
257 10Hz) and recovered after 5 minutes of green illumination ( $\lambda$ =505nm, 2.0mW, 10Hz). Intra-  
258 amygdala injection of optogluram also reduced the depressive-like behavior of neuropathic  
259 mice measured with the splash test. In the dark, 15 minutes after ipsi or contralateral  
260 administration, optogluram (30 $\mu$ M in 500nL of PBS) increased the grooming duration of cuff-  
261 mice, whereas 3 minutes of violet light illumination ( $\lambda$ =385nm, 8.0mW, 10Hz) reduced it to the  
262 levels observed in vehicle-treated cuff mice. Then, the increase of the grooming duration is  
263 restored following 3 minutes of green light illumination ( $\lambda$ =505nm, 2.0mW, 10Hz) (**Figure 4c**).  
264 We verified that light by itself doesn't modify the different symptoms measured in animals  
265 injected with saline solution (500 nL of PBS). Violet- or green-light illumination in the amygdala  
266 had no effect on the measured parameters in absence of the photoswitchable mGlu<sub>4</sub> PAM  
267 (**supplemental figure 3**). Also, photopharmacological manipulation of amygdala mGlu<sub>4</sub> using  
268 optogluram does not modify mechanical sensitivity, thermal sensitivity or grooming in Sham  
269 operated mice (**supplementary figure 4**), similar to what was observed following mGlu<sub>4</sub>  
270 activation with the agonist LSP4-2022 (**supplemental figure 2**).

271 Taken together, these results demonstrate the dynamic nature of mGlu<sub>4</sub> control over  
272 neuropathic pain-related symptoms.

273

### 274 ***Amygdala mGlu<sub>4</sub> photocontrolled activation promotes analgesic conditioned place*** 275 ***preference***

276 Next, we used the analgesic conditioned place preference paradigm (aCPP)(29) to evaluate  
277 the analgesic potential of amygdala mGlu<sub>4</sub> activation in neuropathic mice, without the  
278 involvement of external noxious stimuli. For an enhanced precision, we coupled aCPP with  
279 photopharmacology.

280 Experiments were performed in right implanted male mice, while the mononeuropathy was on  
281 the left hind paw. Experimental conditions for photopharmacological manipulations were  
282 similar to those described above, except that illumination was automatically controlled through  
283 a videotracking device detecting the location of the mouse.

284 Conditioning was performed twice daily for 5 days. During this conditioning period, neuropathic  
285 or sham mice received an intra-amygdala administration of either vehicle (500 nL of PBS) or  
286 optogluram (30 $\mu$ M in 500nL of PBS) and, depending on their position in a two-chamber arena,  
287 they automatically received either a green or violet illumination through an optic fiber (**Figure**  
288 **5a, b**). We verified that chronic treatment with optogluram does not lead to tolerance.  
289 Neuropathic mice received an intra-amygdala microinjection of optogluram (30 $\mu$ M in 500nL  
290 PBS) twice daily for 5 days, which corresponds to the conditioning period. We measured the  
291 antiallodynic effect of optogluram on day 6 (**supplementary figure 5**) and observed no  
292 difference on the peak effect of the drug (15 minutes following intra-amygdala injection of  
293 optogluram) on the paw withdrawal threshold measured by the Von Frey technique that was  
294 measured at D14 post-induction.

295 On the 6<sup>th</sup> day, we tested the eventual preference of neuropathic or sham mice for the “green  
296 chamber” (in which optogluram was switched-on through green illumination) over the “violet  
297 chamber” (in which it was switched-off through violet illumination). During this test, mice  
298 received no drug or light treatment. The time spent in each chambers is measured using the  
299 videotracking device. As can be seen in **Figure 5c-f**, the group of conditioned neuropathic  
300 mice that received the optogluram treatment significantly preferred the green area, contrary to  
301 the conditioned mice that received saline which exhibited no preference. No difference  
302 between the time spent in the violet or green areas was observed in non-conditioned Sham or  
303 neuropathic mice (**supplementary figure 6 and 7**).

304 These experiments demonstrate the analgesic potential of amygdala mGlu<sub>4</sub> activation in  
305 neuropathic mice.

306

307

## 308 **DISCUSSION**

309 In this study, we demonstrate that sensory and depressive symptoms of neuropathic pain are  
310 rapidly relieved under mGlu<sub>4</sub> control in male and female mice, and that ipsi or controlateral  
311 amygdala differentially contribute to the modulation of these symptoms. The controlateral  
312 amygdala is necessary and sufficient to alleviate both sensory and depressive-like symptoms  
313 resulting from peripheral mononeuropathy, while mGlu<sub>4</sub> activation in the ipsilateral amygdala  
314 is only reducing depressive-like symptoms (**Figure 6**). Using photopharmacology, we reveal  
315 that amygdala mGlu<sub>4</sub> exerts a rapid and dynamic control over neuropathic pain-related  
316 symptoms. The analgesic potential of amygdala mGlu<sub>4</sub> activation was further underlined in the  
317 conditioned place preference paradigm. This method has been successfully used to probe the  
318 efficacy of various analgesics (29, 37). The interest of aCPP is that subject animals determine  
319 by themselves the analgesic efficacy of a given treatment, without the involvement of external

320 noxious stimuli. Here, we coupled aCPP with photopharmacology for the first time to our  
321 knowledge. All mice received a similar treatment by a photoswitchable mGlu<sub>4</sub> enhancer and,  
322 depending on their position in a two-chamber arena automatically detected by a videotracking  
323 device coupled to the illumination source, the ligand was activated or deactivated by light. After  
324 the conditioning period, mice clearly preferred the context in which the activity of amygdala  
325 mGlu<sub>4</sub> receptors was potentiated. Also of interest, we did not observe a decrease efficacy of  
326 antiallodynic action following repeated treatment by optogluram, indicating a lack of tolerance  
327 **(supplemental figure 5)**. Our results extend previous works demonstrating that exogenous  
328 activation of mGlu<sub>4</sub> receptors is beneficial for chronic pain symptoms. Systemic administration  
329 of the mGlu<sub>4</sub> selective agonist LSP4-2022 relieves symptoms of chronic pain from different  
330 etiologies (20). At the spinal cord level, mGlu<sub>4</sub> receptors are found in the inner laminae II of the  
331 dorsal horn, a region that receives the afferences from nociceptive A $\delta$ - and C-fibers, where its  
332 activation reduces excitatory neurotransmission through the inhibition of Ca<sup>2+</sup> entry via N or  
333 P/Q type voltage-gated calcium channels in the presynaptic terminal (20). Intrathecal injection  
334 of mGlu<sub>4</sub> agonists, such as LSP4-2022, or allosteric enhancers, such as PHCCC or  
335 VU0155041, alleviates allodynia and hyperalgesia induced by both inflammatory or  
336 neuropathic pain without altering acute pain perception in naive animals (19-21). At the  
337 supraspinal level, mGlu<sub>4</sub> receptors have been identified in important regions for pain  
338 processing, such as the thalamus (38) and the amygdala (17). Bilateral activation of amygdala  
339 mGlu<sub>4</sub> alleviates pain symptoms in a mouse model of persistent inflammatory pain (17). Taken  
340 together, these results demonstrate the ability of mGlu<sub>4</sub> to modulate various symptoms of  
341 chronic pain of different etiologies, without modifying acute pain perception, reinforcing its  
342 therapeutic interest for the treatment of pathological pain.

343 Curiously, we did not observe an asymmetrical lateralization between the right or left  
344 amygdala. Indeed, previous studies have described a hemispheric specialization of pain-  
345 related functions in amygdala (see (32) for review). For example, independently of the inflamed  
346 side, the modulation of mechanic allodynia solely occurs following the blockade of right but not  
347 left CeA mGlu<sub>5</sub> receptors and ERK pathways (13, 39, 40). Similarly, sensitization is only  
348 observed in the right CeA following right or left monoarthritis (41). In our experiments however,  
349 mGlu<sub>4</sub> receptors from both sides can modulate sensory or depressive-like symptoms,  
350 depending on their relative position to the peripheral mononeuropathy, the key for the  
351 modulation of sensory symptoms being the localization on the contralateral side to the  
352 constriction of the sciatic nerve. Noteworthy, studies revealing the specialization of amygdala  
353 function in pain were performed in CeA (32), whereas the amygdalar expression of mGlu<sub>4</sub>  
354 receptors is mainly restricted to terminals arriving in the BLA and the LA, with only little or no

355 expression in the CeA (17). Thus, the absence of specialization of left or right amygdala mGlu<sub>4</sub>  
356 function could result from the localization of mGlu<sub>4</sub> receptors in LA and BLA rather than in CeA.

357 Interestingly, the fact that amygdala mGlu<sub>4</sub> on the ipsi or controlateral side to the nerve  
358 constriction differentially contributes to pain modulation suggests that mGlu<sub>4</sub> achieves its  
359 analgesic effects through the neuromodulation of different circuits (**Figure 6**). Indeed, while  
360 mGlu<sub>4</sub> activation in the controlateral amygdala to the mononeuropathy relieves both sensory  
361 and depressive-like symptoms, their activation on the ipsilateral amygdala solely decreases  
362 depressive-like symptoms. This indicates that at least two different circuits are at play,  
363 differentially regulating sensory and anxiodepressive components, and that mGlu<sub>4</sub> can  
364 modulate both of them. These circuits remain to be identified.

365 The necessity to activate mGlu<sub>4</sub> on the contralateral side to the mononeuropathy to alleviate  
366 hypersensitivity suggests that the regulation of sensory symptoms may occur through a  
367 modulation of the sensory modalities coming from thalamus nuclei (5). Indeed, in the  
368 spinothalamic tract, most secondary projection neurons of the spinal cord which transmit  
369 nociceptive information received from peripheral sensory neurons decussate and send  
370 ascending information terminating in various thalamic nuclei (4). As a result, activation of the  
371 thalamus is significantly greater in the hemisphere contralateral to the stimulus, consistent with  
372 its involvement in the processing the sensory-discriminative aspects of pain (42). This means  
373 that peripheral nociceptive information from the left side of the body is transmitted to the right  
374 side at the supraspinal level, and conversely. We have previously shown that mGlu<sub>4</sub> receptors  
375 are expressed in presynaptic terminals of glutamatergic and GABAergic neurons arriving in  
376 the LA and BLA, where they downregulate the transmission coming from the thalamus (17).  
377 Their activation could in turn normalize the activities of LA and BLA neurons. One of the main  
378 target of those neurons is CeA. Thus, we can speculate that mGlu<sub>4</sub> may modulate the activity  
379 within the BLA–CeA circuit, which has been implicated in the generation and modulation of  
380 pain-like behaviors (5, 43). Besides the CeA, several pathways regulating specific aspects of  
381 pain originating from BLA have been identified recently. For example, the BLA–mPFC–PAG  
382 pathway is crucial for the development of mechanical and thermal hypersensitivity after  
383 peripheral nerve injury (44) and could be another pathway involved in the reduction of  
384 mechanical and thermal hypersensitivity following mGlu<sub>4</sub> activation. We can also hypothesized  
385 that mGlu<sub>4</sub> activation could modulate the neural ensemble within BLA identified by Corder and  
386 colleagues that mediates chronic pain unpleasantness (45). However, these points remain  
387 largely speculative and further studies will be required in order to identify the input and output  
388 circuits modulated by amygdala mGlu<sub>4</sub> receptors.

389 In conclusion, this study provides strong evidence for a rapid and reversible regulation of  
390 neuropathic pain following activation of mGlu<sub>4</sub> receptors in the amygdala. The data underline  
391 the therapeutic potential of mGlu<sub>4</sub> receptors for chronic pain management.

392

393

394 **FUNDING AND DISCLOSURE (COVERS ALL AUTHORS AND SOURCES OF FUNDING**  
395 **LISTED FOR THE MANUSCRIPT)**

396 This work was supported by the International Emerging Action (IEA) from the Centre National  
397 de la Recherche Scientifique (CNRS) to CG and AL and by grants from the French National  
398 Research Agency (ANR): ANR-16-CE16-0010 to CG and ANR-17-NEU3-0001 under the  
399 frame of Neuron Cofund to CG and AL.

400

401

402 **ACKNOWLEDGMENTS (INCLUDES SPECIAL THANKS OR DEDICATIONS)**

403 The authors wish to thank Dr. Francine Acher for kindly providing LSP4-2022, Dr. Guillaume  
404 Lebon, Dr. Julie Le Merrer, Dr. Jérôme Becker and Dr. Laurent Givalois for helpful discussions  
405 and Dr. Ebba L. Lagerqvist for critical reading of the manuscript. Behavioral experiments were  
406 performed at the *iExplore* facility of Montpellier Biocampus and the authors thank the staff of  
407 the facility for their technical help. The illustrative graphics were created with BioRender.com.

408

409

410 **AUTHOR CONTRIBUTIONS (MANDATORY) FOR ALL AUTHORS**

411 VP and CG conceived the original idea and contributed to conception of the study. VP, JAA,  
412 and CG designed the experiments. VP and JAA performed experiments. VP, JAA and CG  
413 analyzed the data. AL contributed essential materials. All authors contributed to interpretation  
414 of the results. CG wrote the manuscript and all authors provided critical feedback on the  
415 manuscript.

416

417 **BIBLIOGRAPHY**

- 418 1. Colloca L, Ludman T, Bouhassira D, Baron R, Dickenson AH, Yarnitsky D, et al.  
419 Neuropathic pain. *Nat Rev Dis Primers*. 2017;3:17002. doi:10.1038/nrdp.2017.2
- 420 2. van Hecke O, Austin SK, Khan RA, Smith BH, Torrance N. Neuropathic pain in the  
421 general population: a systematic review of epidemiological studies. *Pain*.  
422 2014;155(4):654-62. doi:10.1016/j.pain.2013.11.013
- 423 3. Alles SRA, Smith PA. Etiology and Pharmacology of Neuropathic Pain. *Pharmacol*  
424 *Rev*. 2018;70(2):315-47. doi:10.1124/pr.117.014399
- 425 4. Kuner R, Kuner T. Cellular Circuits in the Brain and Their Modulation in Acute and  
426 Chronic Pain. *Physiol Rev*. 2021;101(1):213-58. doi:10.1152/physrev.00040.2019
- 427 5. Neugebauer V. Amygdala physiology in pain. *Handb Behav Neurosci*.  
428 2020;26:101-13. doi:10.1016/b978-0-12-815134-1.00004-0
- 429 6. Palmiter RD. The Parabrachial Nucleus: CGRP Neurons Function as a General  
430 Alarm. *Trends Neurosci*. 2018;41(5):280-93. doi:10.1016/j.tins.2018.03.007
- 431 7. Mercer Lindsay N, Chen C, Gilam G, Mackey S, Scherrer G. Brain circuits for pain  
432 and its treatment. *Sci Transl Med*. 2021;13(619):eabj7360.  
433 doi:10.1126/scitranslmed.abj7360
- 434 8. Neugebauer V, Mazzitelli M, Cragg B, Ji G, Navratilova E, Porreca F. Amygdala,  
435 neuropeptides, and chronic pain-related affective behaviors. *Neuropharmacology*.  
436 2020;170:108052. doi:10.1016/j.neuropharm.2020.108052
- 437 9. Hasanein P, Parviz M, Keshavarz M, Javanmardi K. CB1 receptor activation in the  
438 basolateral amygdala produces antinociception in animal models of acute and  
439 tonic nociception. *Clin Exp Pharmacol Physiol*. 2007;34(5-6):439-49.  
440 doi:10.1111/j.1440-1681.2007.04592.x
- 441 10. Roche M, O'Connor E, Diskin C, Finn DP. The effect of CB(1) receptor antagonism  
442 in the right basolateral amygdala on conditioned fear and associated analgesia in  
443 rats. *Eur J Neurosci*. 2007;26(9):2643-53. doi:10.1111/j.1460-9568.2007.05861.x
- 444 11. Wahis J, Baudon A, Althammer F, Kerspern D, Goyon S, Hagiwara D, et al.  
445 Astrocytes mediate the effect of oxytocin in the central amygdala on neuronal  
446 activity and affective states in rodents. *Nat Neurosci*. 2021;24(4):529-41.  
447 doi:10.1038/s41593-021-00800-0
- 448 12. Palazzo E, Fu Y, Ji G, Maione S, Neugebauer V. Group III mGluR7 and mGluR8  
449 in the amygdala differentially modulate nocifensive and affective pain behaviors.  
450 *Neuropharmacology*. 2008;55(4):537-45. doi:10.1016/j.neuropharm.2008.05.007
- 451 13. Kolber BJ, Montana MC, Carrasquillo Y, Xu J, Heinemann SF, Muglia LJ, et al.  
452 Activation of metabotropic glutamate receptor 5 in the amygdala modulates pain-  
453 like behavior. *The Journal of neuroscience : the official journal of the Society for*  
454 *Neuroscience*. 2010;30(24):8203-13. doi:10.1523/JNEUROSCI.1216-10.2010



- 455 14. Pereira V, Goudet C. Emerging Trends in Pain Modulation by Metabotropic  
456 Glutamate Receptors. *Front Mol Neurosci.* 2018;11:464.  
457 doi:10.3389/fnmol.2018.00464
- 458 15. Gregory KJ, Goudet C. International Union of Basic and Clinical Pharmacology.  
459 CXI. Pharmacology, Signaling, and Physiology of Metabotropic Glutamate  
460 Receptors. *Pharmacol Rev.* 2021;73(1):521-69. doi:10.1124/pr.119.019133
- 461 16. Mazzitelli M, Presto P, Antenucci N, Meltan S, Neugebauer V. Recent Advances  
462 in the Modulation of Pain by the Metabotropic Glutamate Receptors. *Cells.*  
463 2022;11(16). doi:10.3390/cells11162608
- 464 17. Zussy C, Gomez-Santacana X, Rovira X, De Bundel D, Ferrazzo S, Bosch D, et  
465 al. Dynamic modulation of inflammatory pain-related affective and sensory  
466 symptoms by optical control of amygdala metabotropic glutamate receptor 4. *Mol*  
467 *Psychiatry.* 2018;23(3):509-20. doi:10.1038/mp.2016.223
- 468 18. Chen SR, Pan HL. Distinct roles of group III metabotropic glutamate receptors in  
469 control of nociception and dorsal horn neurons in normal and nerve-injured Rats.  
470 *J Pharmacol Exp Ther.* 2005;312(1):120-6. doi:10.1124/jpet.104.073817
- 471 19. Goudet C, Chapuy E, Alloui A, Acher F, Pin JP, Eschaliere A. Group III metabotropic  
472 glutamate receptors inhibit hyperalgesia in animal models of inflammation and  
473 neuropathic pain. *Pain.* 2008;137(1):112-24. doi:10.1016/j.pain.2007.08.020
- 474 20. Vilar B, Busserolles J, Ling B, Laffray S, Ulmann L, Malhaire F, et al. Alleviating  
475 pain hypersensitivity through activation of type 4 metabotropic glutamate receptor.  
476 *The Journal of neuroscience : the official journal of the Society for Neuroscience.*  
477 2013;33(48):18951-65. doi:10.1523/JNEUROSCI.1221-13.2013
- 478 21. Wang H, Jiang W, Yang R, Li Y. Spinal metabotropic glutamate receptor 4 is  
479 involved in neuropathic pain. *Neuroreport.* 2011;22(5):244-8.  
480 doi:10.1097/WNR.0b013e3283453843
- 481 22. Hull K, Morstein J, Trauner D. In Vivo Photopharmacology. *Chem Rev.*  
482 2018;118(21):10710-47. doi:10.1021/acs.chemrev.8b00037
- 483 23. Berizzi AE, Goudet C. Strategies and considerations of G-protein-coupled receptor  
484 photopharmacology. *Adv Pharmacol.* 2020;88:143-72.  
485 doi:10.1016/bs.apha.2019.12.001
- 486 24. Yalcin I, Bohren Y, Waltisperger E, Sage-Ciocca D, Yin JC, Freund-Mercier MJ, et  
487 al. A time-dependent history of mood disorders in a murine model of neuropathic  
488 pain. *Biol Psychiatry.* 2011;70(10):946-53. doi:10.1016/j.biopsych.2011.07.017
- 489 25. Yalcin I, Megat S, Barthas F, Waltisperger E, Kremer M, Salvat E, et al. The sciatic  
490 nerve cuffing model of neuropathic pain in mice. *J Vis Exp.* 2014(89).  
491 doi:10.3791/51608



- 492 26. Bonin RP, Bories C, De Koninck Y. A simplified up-down method (SUDO) for  
493 measuring mechanical nociception in rodents using von Frey filaments. *Mol Pain*.  
494 2014;10:26. doi:10.1186/1744-8069-10-26
- 495 27. Hargreaves K, Dubner R, Brown F, Flores C, Joris J. A new and sensitive method  
496 for measuring thermal nociception in cutaneous hyperalgesia. *Pain*. 1988;32(1):77-  
497 88. doi:10.1016/0304-3959(88)90026-7
- 498 28. Kremer M, Becker LJ, Barrot M, Yalcin I. How to study anxiety and depression in  
499 rodent models of chronic pain? *Eur J Neurosci*. 2021;53(1):236-70.  
500 doi:10.1111/ejn.14686
- 501 29. Sufka KJ. Conditioned place preference paradigm: a novel approach for analgesic  
502 drug assessment against chronic pain. *Pain*. 1994;58(3):355-66.  
503 doi:10.1016/0304-3959(94)90130-9
- 504 30. Pittolo S, Gomez-Santacana X, Eckelt K, Rovira X, Dalton J, Goudet C, et al. An  
505 allosteric modulator to control endogenous G protein-coupled receptors with light.  
506 *Nature chemical biology*. 2014;10(10):813-5. doi:10.1038/nchembio.1612
- 507 31. Goudet C, Vilar B, Courtiol T, Deltheil T, Bessiron T, Brabet I, et al. A novel  
508 selective metabotropic glutamate receptor 4 agonist reveals new possibilities for  
509 developing subtype selective ligands with therapeutic potential. *FASEB journal* :  
510 official publication of the Federation of American Societies for Experimental  
511 Biology. 2012;26(4):1682-93. doi:10.1096/fj.11-195941
- 512 32. Allen HN, Bobnar HJ, Kolber BJ. Left and right hemispheric lateralization of the  
513 amygdala in pain. *Prog Neurobiol*. 2021;196:101891.  
514 doi:10.1016/j.pneurobio.2020.101891
- 515 33. Sharp JL, Pearson T, Smith MA. Sex differences in opioid receptor mediated  
516 effects: Role of androgens. *Neurosci Biobehav Rev*. 2022;134:104522.  
517 doi:10.1016/j.neubiorev.2022.104522
- 518 34. Cabanero D, Villalba-Riquelme E, Fernandez-Ballester G, Fernandez-Carvajal A,  
519 Ferrer-Montiel A. ThermoTRP channels in pain sexual dimorphism: new insights  
520 for drug intervention. *Pharmacol Ther*. 2022:108297.  
521 doi:10.1016/j.pharmthera.2022.108297
- 522 35. Presto P, Mazzitelli M, Junell R, Griffin Z, Neugebauer V. Sex differences in pain  
523 along the neuraxis. *Neuropharmacology*. 2022;210:109030.  
524 doi:10.1016/j.neuropharm.2022.109030
- 525 36. Presto P, Neugebauer V. Sex Differences in CGRP Regulation and Function in the  
526 Amygdala in a Rat Model of Neuropathic Pain. *Front Mol Neurosci*.  
527 2022;15:928587. doi:10.3389/fnmol.2022.928587

- 528 37. McKendrick G, Graziane NM. Drug-Induced Conditioned Place Preference and Its  
529 Practical Use in Substance Use Disorder Research. *Front Behav Neurosci.*  
530 2020;14:582147. doi:10.3389/fnbeh.2020.582147
- 531 38. Corti C, Aldegheri L, Somogyi P, Ferraguti F. Distribution and synaptic localisation  
532 of the metabotropic glutamate receptor 4 (mGluR4) in the rodent CNS.  
533 *Neuroscience.* 2002;110(3):403-20. doi:10.1016/s0306-4522(01)00591-7
- 534 39. Carrasquillo Y, Gereau RWt. Activation of the extracellular signal-regulated kinase  
535 in the amygdala modulates pain perception. *The Journal of neuroscience : the*  
536 *official journal of the Society for Neuroscience.* 2007;27(7):1543-51.  
537 doi:10.1523/JNEUROSCI.3536-06.2007
- 538 40. Carrasquillo Y, Gereau RWt. Hemispheric lateralization of a molecular signal for  
539 pain modulation in the amygdala. *Mol Pain.* 2008;4:24. doi:10.1186/1744-8069-4-  
540 24
- 541 41. Ji G, Neugebauer V. Hemispheric lateralization of pain processing by amygdala  
542 neurons. *J Neurophysiol.* 2009;102(4):2253-64. doi:10.1152/jn.00166.2009
- 543 42. Youell PD, Wise RG, Bentley DE, Dickinson MR, King TA, Tracey I, et al.  
544 Lateralisation of nociceptive processing in the human brain: a functional magnetic  
545 resonance imaging study. *Neuroimage.* 2004;23(3):1068-77.  
546 doi:10.1016/j.neuroimage.2004.07.004
- 547 43. Mazzitelli M, Marshall K, Pham A, Ji G, Neugebauer V. Optogenetic Manipulations  
548 of Amygdala Neurons Modulate Spinal Nociceptive Processing and Behavior  
549 Under Normal Conditions and in an Arthritis Pain Model. *Front Pharmacol.*  
550 2021;12:668337. doi:10.3389/fphar.2021.668337
- 551 44. Huang J, Gadotti VM, Chen L, Souza IA, Huang S, Wang D, et al. A neuronal circuit  
552 for activating descending modulation of neuropathic pain. *Nat Neurosci.*  
553 2019;22(10):1659-68. doi:10.1038/s41593-019-0481-5
- 554 45. Corder G, Ahanonu B, Grewe BF, Wang D, Schnitzer MJ, Scherrer G. An  
555 amygdalar neural ensemble that encodes the unpleasantness of pain. *Science.*  
556 2019;363(6424):276-81. doi:10.1126/science.aap8586

557

558

559 **FIGURE LEGENDS**

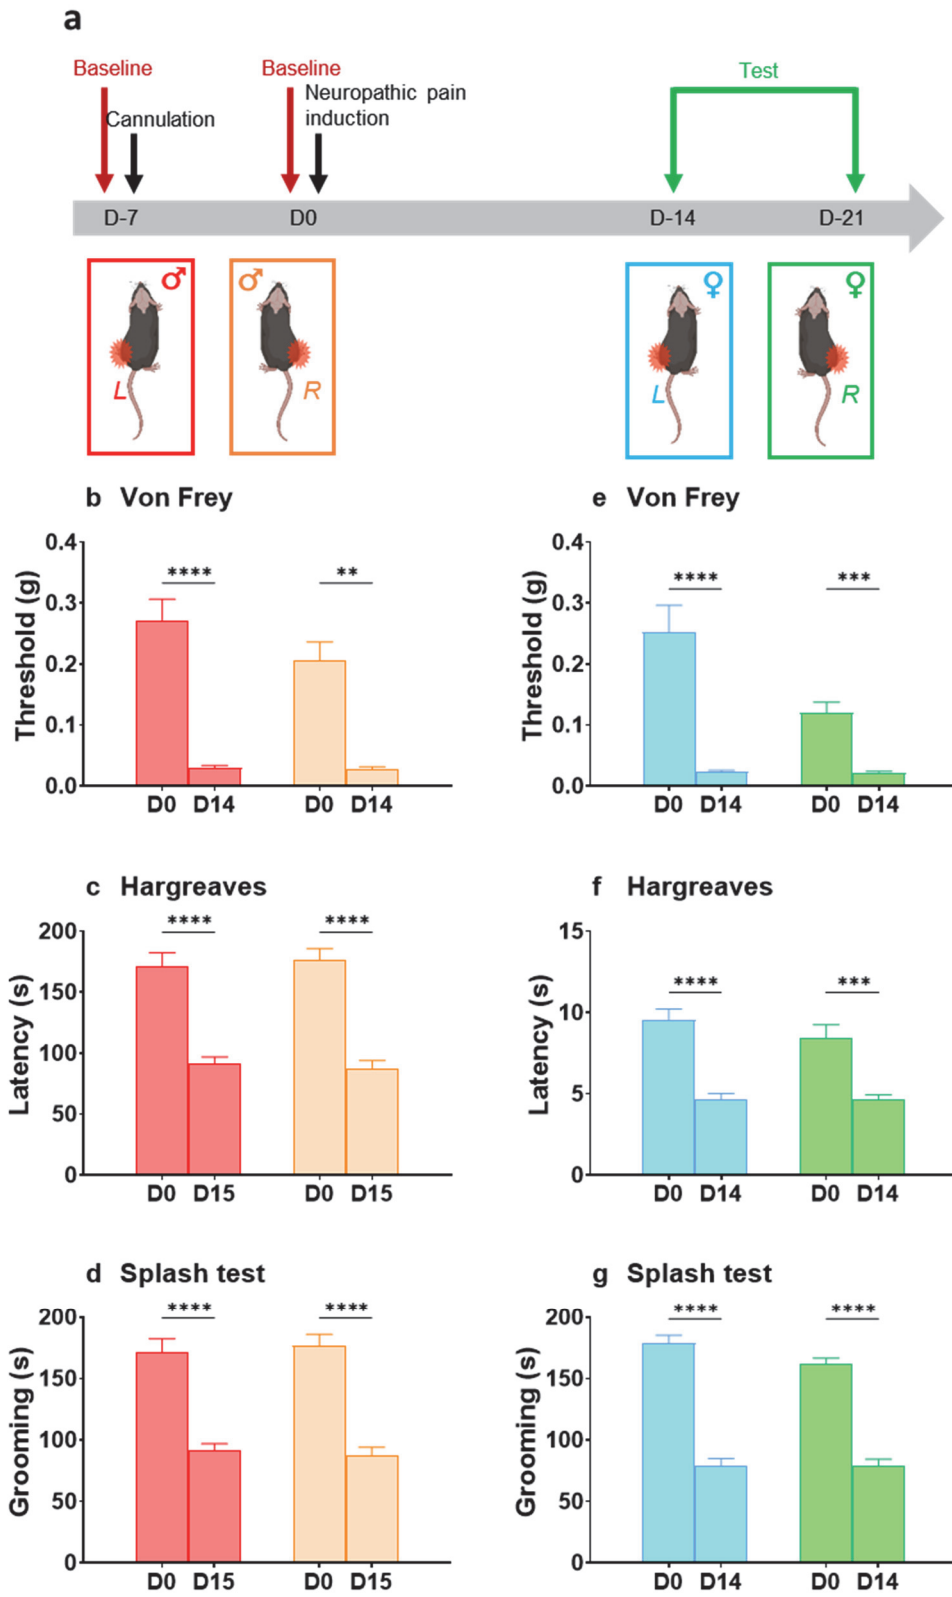

560

561 **Figure 1. Cuff-induced mononeuropathic pain model leads to sensory and depressive-**  
562 **like symptoms in male and female mice symptoms.**

563 Peripheral mononeuropathy was induced by positioning a cuff around the sciatic nerve of the  
564 left or right hind paw of male and female mice. **a**: Experimental design and timeline of  
565 behavioral tests. **b, e**: Mechanical allodynia was observed both in male or female mice, 14  
566 days after implantation of the Cuff either on the left or right hind paw, as indicated by the  
567 significant reduction of the ipsilateral paw withdrawal thresholds measured using the Von Frey  
568 technique (n=10, D0 vs D14, two-way ANOVA, Sidak's post-hoc test). **c, f**: Heat allodynia was  
569 observed both in male or female mice, 14 days after implantation of the Cuff either on the left  
570 or right hind paw, as indicated by the significant reduction of the latency to withdraw the paw  
571 in the Hargreaves test (n=10, D0 vs D14, two-way ANOVA, Sidak's post-hoc test). **d, g**:  
572 Depressive-like behavior assessed in the splash test revealed a significant decrease in  
573 grooming duration in both male and female Cuff mice, 15 days after induction (male n=10,  
574 female n=10, D0 vs D14, two-way ANOVA, Sidak's post-hoc test).

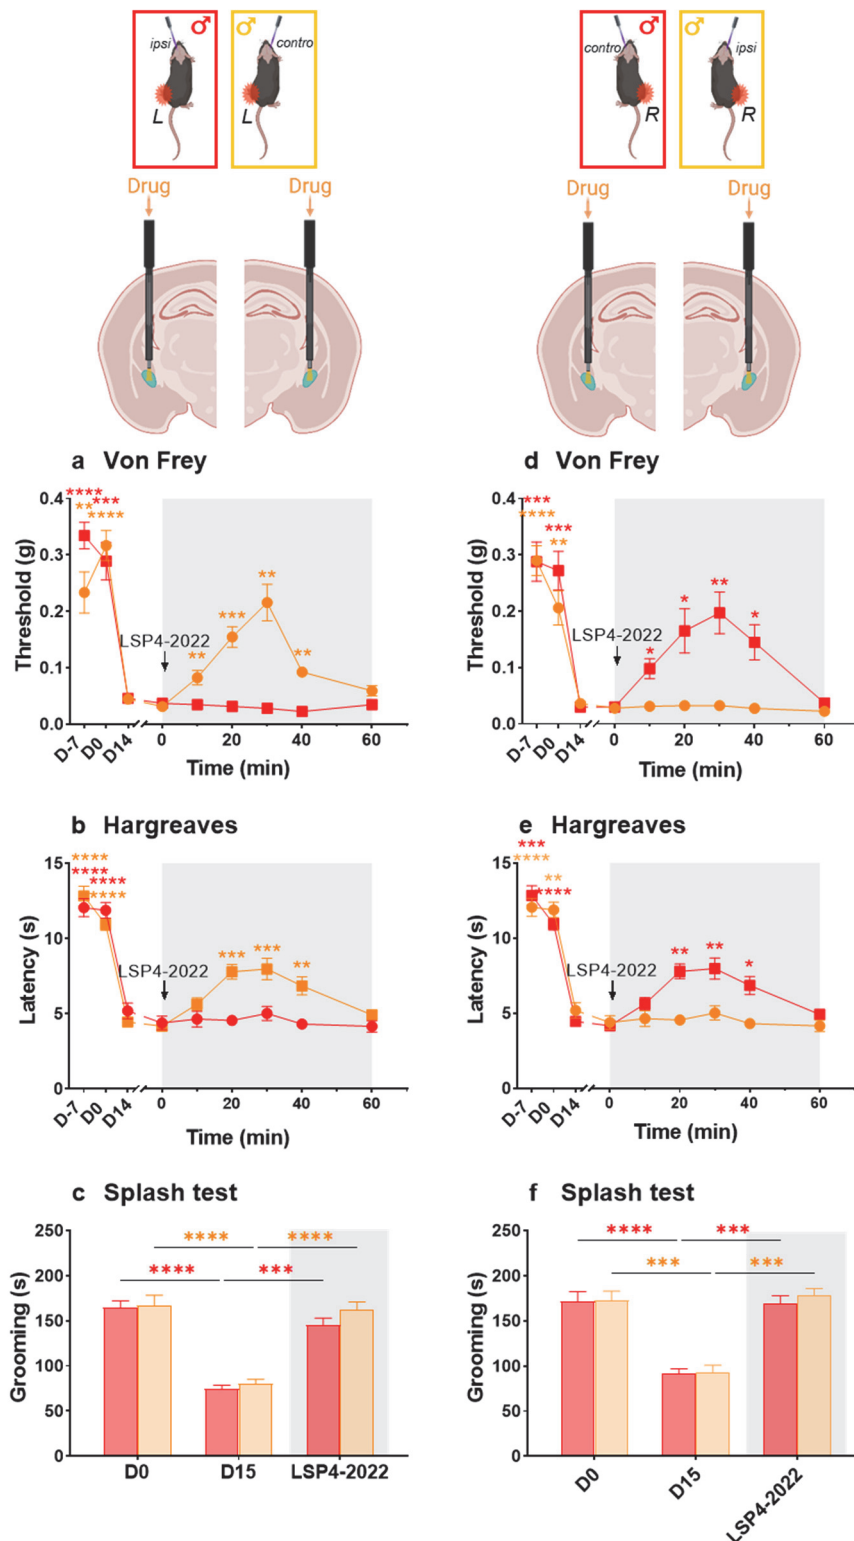

575

576 **Figure 2: mGlu<sub>4</sub> activation in the amygdala differentially inhibits hypersensitivity and**  
577 **depressive-like behaviour in male neuropathic mice.**

578 Peripheral mononeuropathy was induced by positioning a cuff around the sciatic nerve of the  
579 left or right hind paw of male mice. Beforehand, mice were implanted with a cannula on the  
580 ipsilateral or contralateral amygdala (left cuff for females). On the test day, at  $t_0$ , mice were

581 injected with the selective mGlu<sub>4</sub> agonist, LSP4-2022 (5 μM, 500 nL in PBS) either on the ipsi  
582 or controlateral amygdala to the mononeuropathy and the subsequent effects on neuropathic  
583 pain symptoms were measured. **a, d:** Effect on mechanical allodynia of mGlu<sub>4</sub> activation on  
584 the ipsilateral or contralateral amygdala on male mice with a mononeuropathy on the left or  
585 right hind paw. Mechanical allodynia as determined by the Von Frey technique. Mean threshold  
586 ± SEM (g), t<sub>x</sub> vs t<sub>0</sub> (0 min), two-way ANOVA, Dunnett's post-hoc test..**b, e:** Effect on heat  
587 allodynia of mGlu<sub>4</sub> activation on the ipsilateral or contralateral amygdala on male mice with a  
588 mononeuropathy on the right or left hind paw. Thermal allodynia as determined by Hargreaves  
589 method. Mean threshold ± SEM (s), t<sub>x</sub> vs t<sub>0</sub> (0 min), two-way ANOVA, Dunnett's post-hoc test  
590 **c, f:** Effect on depressive-like symptoms of mGlu<sub>4</sub> activation on the ipsilateral or contralateral  
591 amygdala on male mice with a mononeuropathy on the right or left hind paw. Depressive-like  
592 symptoms as determined by the Splash Test. Mean grooming time ± SEM; t<sub>x</sub> vs t<sub>0</sub> (0 min), two-  
593 way ANOVA, Tukey's post-hoc test.

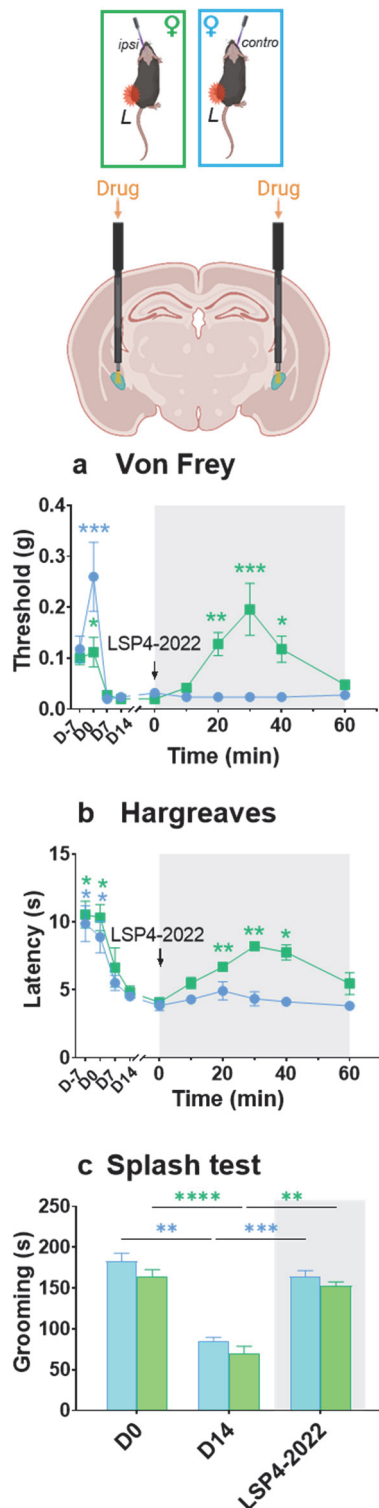

594

595 **Figure 3: mGlu<sub>4</sub> activation in the amygdala differentially inhibits hypersensitivity and**  
596 **depressive-like behaviour in female neuropathic mice.**

597 Peripheral mononeuropathy was induced by positioning a cuff around the sciatic nerve of the  
598 left hind paw of female mice. Beforehand, mice were implanted with a cannula on the ipsilateral  
599 or contralateral amygdala. On the test day, at t<sub>0</sub>, mice were injected with the selective mGlu<sub>4</sub>



600 agonist, LSP4-2022 (5  $\mu$ M, 500 nL in PBS) either on the ipsi or controlateral amygdala to the  
601 mononeuropathy and the subsequent effects on neuropathic pain symptoms were measured.  
602 **a:** Effect on mechanical allodynia of mGlu<sub>4</sub> activation on the ipsilateral or contralateral  
603 amygdala on female mice with a mononeuropathy on the left or right hind paw. Mechanical  
604 allodynia as determined by the Von Frey technique. Mean threshold  $\pm$  SEM (g),  $t_x$  vs  $t_0$  (0 min),  
605 two-way ANOVA, Dunnett's post-hoc test..**b:** Effect on heat allodynia of mGlu<sub>4</sub> activation on  
606 the ipsilateral or contralateral amygdala on female mice with a mononeuropathy on the right or  
607 left hind paw. Thermal allodynia as determined by Hargreaves method. Mean threshold  $\pm$  SEM  
608 (s),  $t_x$  vs  $t_0$  (0 min), two-way ANOVA, Dunnett's post-hoc test **c:** Effect on depressive-like  
609 symptoms of mGlu<sub>4</sub> activation on the ipsilateral or contralateral amygdala on female mice with  
610 a mononeuropathy on the right or left hind paw. Depressive-like symptoms as determined by  
611 the Splash Test. Mean grooming time  $\pm$  SEM;  $t_x$  vs  $t_0$  (0 min), two-way ANOVA, Tukey's post-  
612 hoc test.

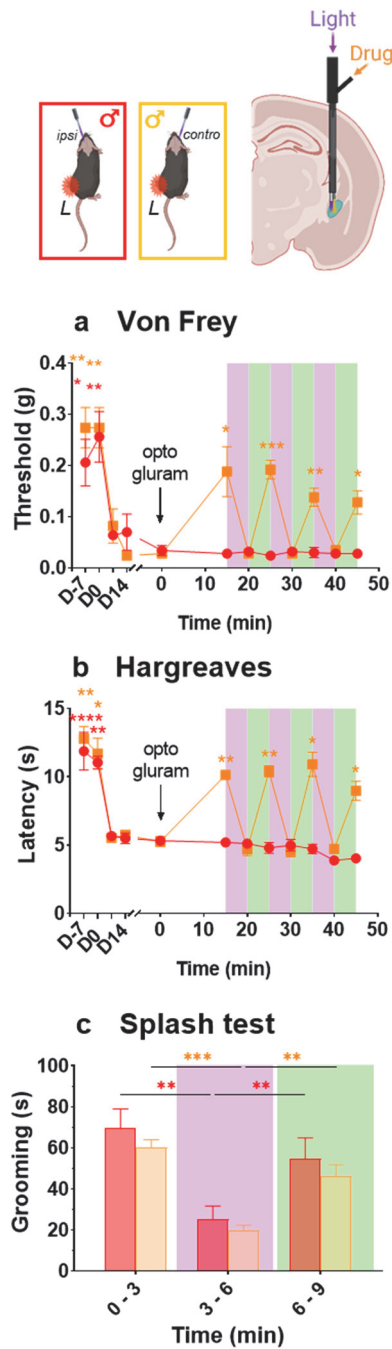

613

614 **Figure 4: Photopharmacological manipulation of mGlu<sub>4</sub> in the amygdala differentially**  
615 **inhibits hypersensitivity and depressive-like behaviour of neuropathic mice.**

616 Effects of amygdala mGlu<sub>4</sub> photocontrol on neuropathic pain symptoms were measured on  
617 male mice with a cuff implanted around the left hind paw, from 14 to 21 days post induction  
618 Local drug and light delivery was performed through a stereotaxically implanted hybrid  
619 optofluidic cannula. On the test day, at t<sub>0</sub>, mice were injected with the photoswitchable mGlu<sub>4</sub>  
620 enhancer, optogluram (30 μM, 500 nL in PBS) either on the ipsi or controlateral amygdala to  
621 the mononeuropathy. Violet (385 nm, 10 Hz, 8 mW) or green light (505 nm, 10Hz, 2 mW) was

622 applied by the mean of an optic fiber connected to a LED light source and a controller. **a.**  
623 Mechanical allodynia as determined by the Von Frey technique. Mean threshold  $\pm$  SEM (g),  $t_x$   
624 vs  $t_0$  (0 min), two-way ANOVA, Dunnett's post-hoc test. **b.** Thermal allodynia as determined by  
625 Hargreaves method. Mean threshold  $\pm$  SEM (s),  $t_x$  vs  $t_0$  (0 min), two-way ANOVA, Dunnett's  
626 post-hoc test. **c.** Depressive-like symptoms as determined by the Splash Test. Mean grooming  
627 time  $\pm$  SEM;  $t_x$  vs  $t_0$  (0 min), two-way ANOVA, Tukey's post-hoc test.

628

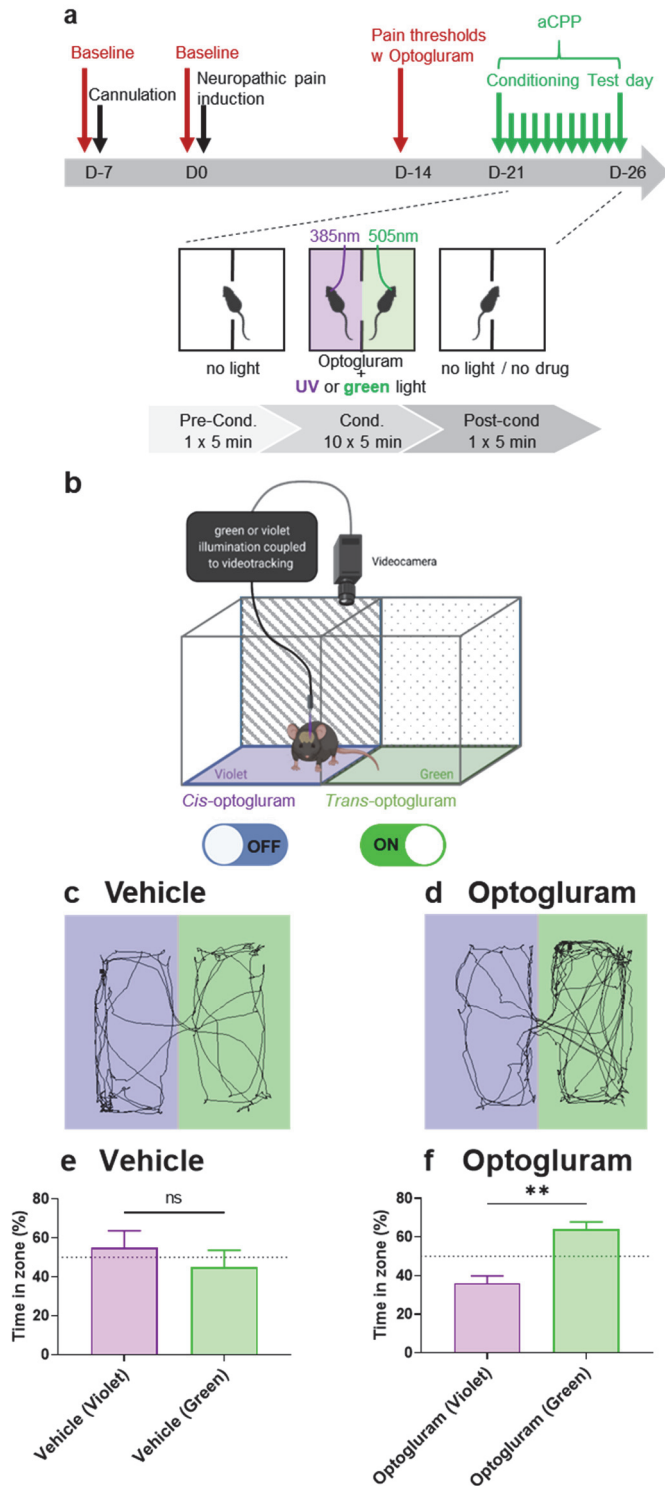

629

630 **Figure 5: Photopharmacological manipulation of amygdala mGlu<sub>4</sub> promotes analgesic**  
631 **conditioned place preference (aCPP) of neuropathic mice.**

632 **a:** Experimental design and timeline of behavioral tests. On these experiments, neuropathy  
633 was induced by application of a cuff on the left hind paw of male mice, beforehand implanted  
634 with a hybrid optofluidic cannula on the contralateral (right) amygdala. The conditioning took

635 place between from day 21 to day 25, the test day was day 26 post surgery. Mice were  
636 submitted to 10 conditioning episodes of 5 minutes, twice daily for 5 days. During each  
637 conditioning episode, animals were injected with either vehicle (PBS) or optogluram (xxx  $\mu$ M,  
638 500nL in PBS). Fifteen minutes after injection (when drug reached its maximal effect), mice  
639 were placed for 5 minutes in a two-chambers arena and allowed to move freely. Mice were  
640 first placed alternatively in the one or the other chamber. The 6<sup>th</sup> day, the animals were placed  
641 in the center of the arena, receiving no drug or light treatment, and their real-time place  
642 preference was measured during 5 minutes through a videotracking software. **b**: Schematic  
643 representation of the aCPP setup. The arena consists in two- chambers with different context  
644 (striped or dotted walls) connected through a central open door. The illumination is  
645 automatically controlled through a video tracking device coupled to the light source controller.  
646 When the mouse is detected in the “violet chamber”, it receives a 385 nm LED illumination,  
647 while it receives a 505 nm LED illumination when it is in the green chamber. **c, d**: Test results:  
648 representative 5-minutes tracks of a neuropathic mouse which received either vehicle (c) or  
649 optogluram (d) during the conditioning period. **e, f**: Test results: mean percentage  $\pm$  SEM of  
650 time spent in the “green chamber” or the “violet chamber” of neuropathic mice treated with  
651 Vehicle (n=8) or with Optogluram (n=12) during conditioning (Mean  $\pm$  SEM, Time in Violet vs  
652 Time in Green area, one-way ANOVA, Tukey’s post-hoc test).

653

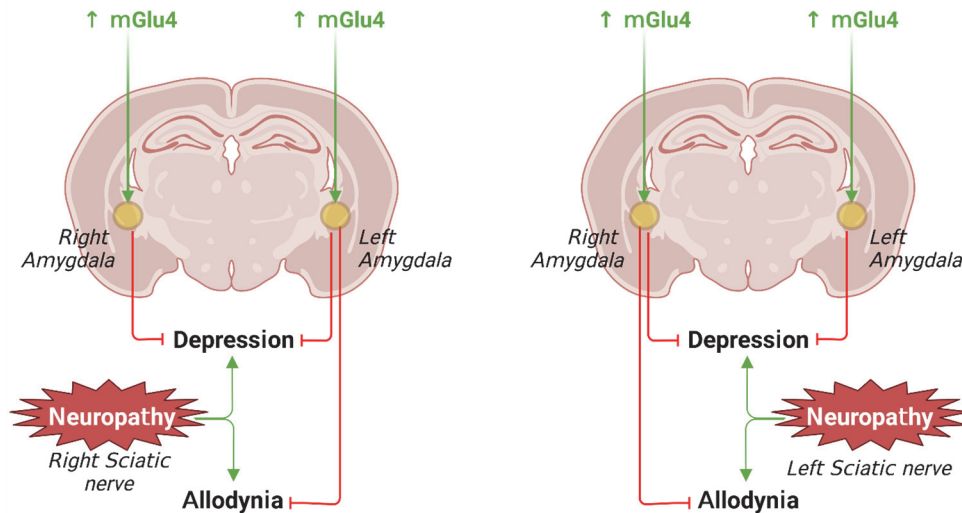

654

655 **Figure 6: Controlateral amygdala mGlu<sub>4</sub> is necessary and sufficient to relieve both**  
656 **sensory and depressive-like symptoms of peripheral mononeuropathy.** Left hindpaw  
657 neuropathic pain sensory and depressive symptoms are relieved by right amygdala mGlu<sub>4</sub>  
658 activation whereas left amygdala mGlu<sub>4</sub> activation solely abolishes depressive-like symptoms.  
659 Conversely, all symptoms resulting from right hindpaw neuropathic pain are relieved by left  
660 amygdala mGlu<sub>4</sub> activation whereas right amygdala mGlu<sub>4</sub> activation solely abolishes  
661 depressive-like symptoms. Ipso facto, activation of mGlu<sub>4</sub> in either ipsilateral or controlateral  
662 amygdala to the mononeuropathy abolishes mice depressive-like behavior.

663

664 SUPPLEMENTAL FIGURES AND LEGENDS

665

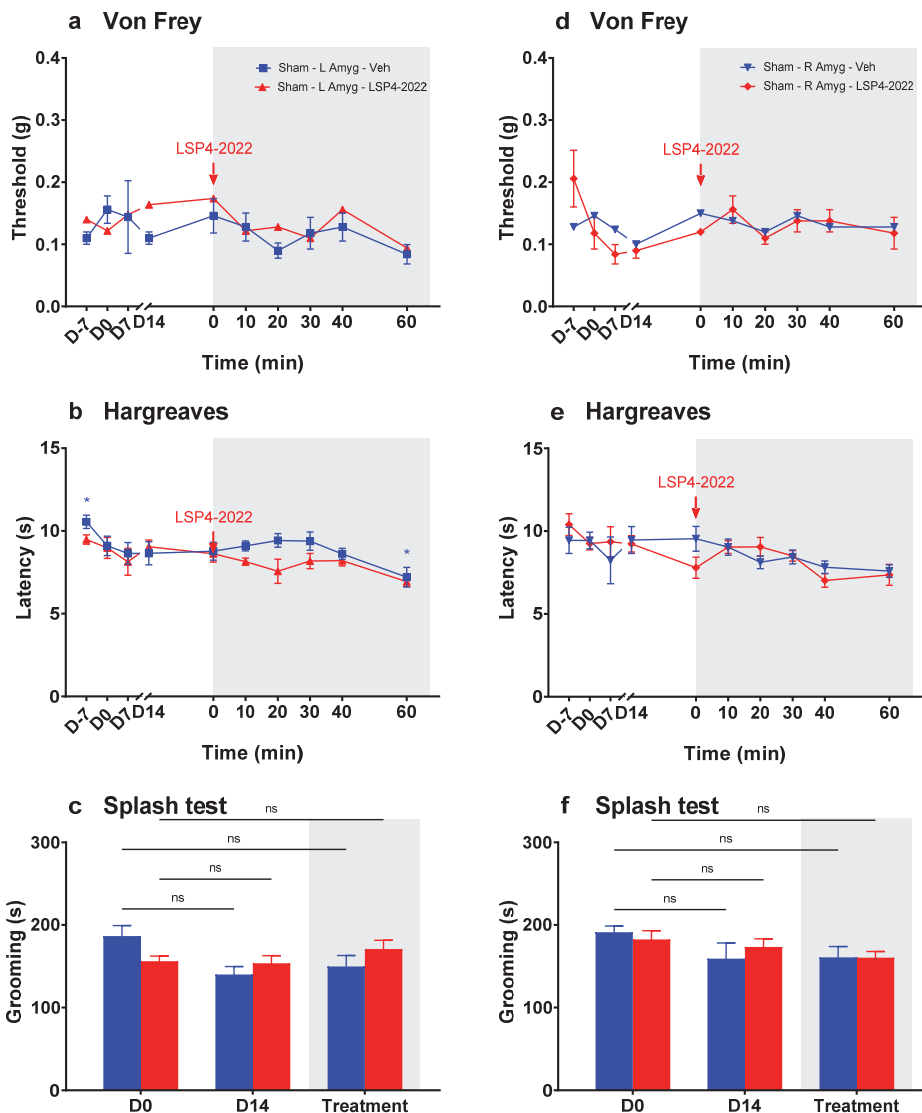

666

667 **Supplemental figure 2: mGlu4 activation in right or left amygdala does not modify**  
668 **mechanical sensitivity, heat sensitivity or grooming in Sham animals.**

669 **a-f:** Females, sham left hindpaw, Vehicle (500 nL PBS, blue) or LSP4-2022 (5  $\mu$ M, 500 nL in  
670 PBS, red) delivered unilaterally in ipsi or controlateral amygdala. **a, d.** Von Frey. Mean  $\pm$  SEM,  
671  $t_x$  vs  $t_0$  (0 min), two-way ANOVA, Dunnett's post-hoc test. **b, e.** Hargreaves. Mean  $\pm$  SEM,  $t_x$   
672 vs  $t_0$  (0 min), two-way ANOVA, Dunnett's post-hoc test.. **c, f.** Splash Test. #  $t_x$  vs  $t_0$  (0 min),  
673 two-way ANOVA, Tukey's post-hoc test.

674



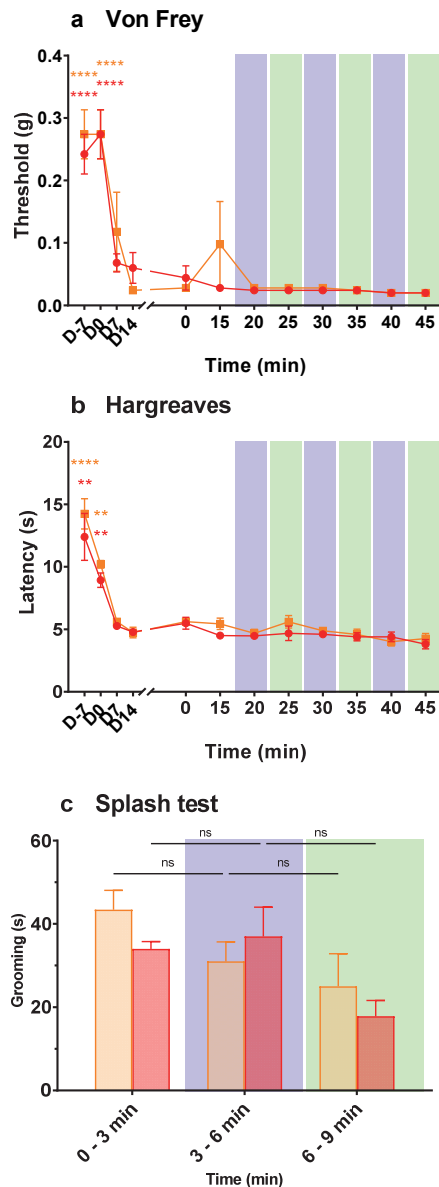

675

676 **Supplemental Figure 3: Lack of effect of UV/green light illumination in neuropathic mice**  
677 **injected by vehicle.**

678 Experiments were performed in the same conditions than those reported in Fig. 4, except that  
679 no photoswitchable ligand was injected. Green or violet light was delivered by a LED light  
680 source through an optic fiber connected to an hybrid optic-fluidic cannula implanted  
681 stereotaxically in the right or left amygdala of male mice with a cuff around the sciatic nerve of  
682 the left hind paw. **a-c:** Males, Cuff left hindpaw, vehicle (500 nL in PBS) delivered unilaterally  
683 in ipsi or controlateral amygdala. **a.** Von Frey. Mean  $\pm$  SEM,  $t_x$  vs  $t_0$  (0 min), two-way ANOVA,  
684 Dunnett's post-hoc test. **b.** Hargreaves. Mean  $\pm$  SEM,  $t_x$  vs  $t_0$  (0 min), two-way ANOVA,  
685 Dunnett's post-hoc test.. **c.** Splash Test. #  $t_x$  vs  $t_0$  (0 min), two-way ANOVA, Tukey's post-hoc  
686 test.

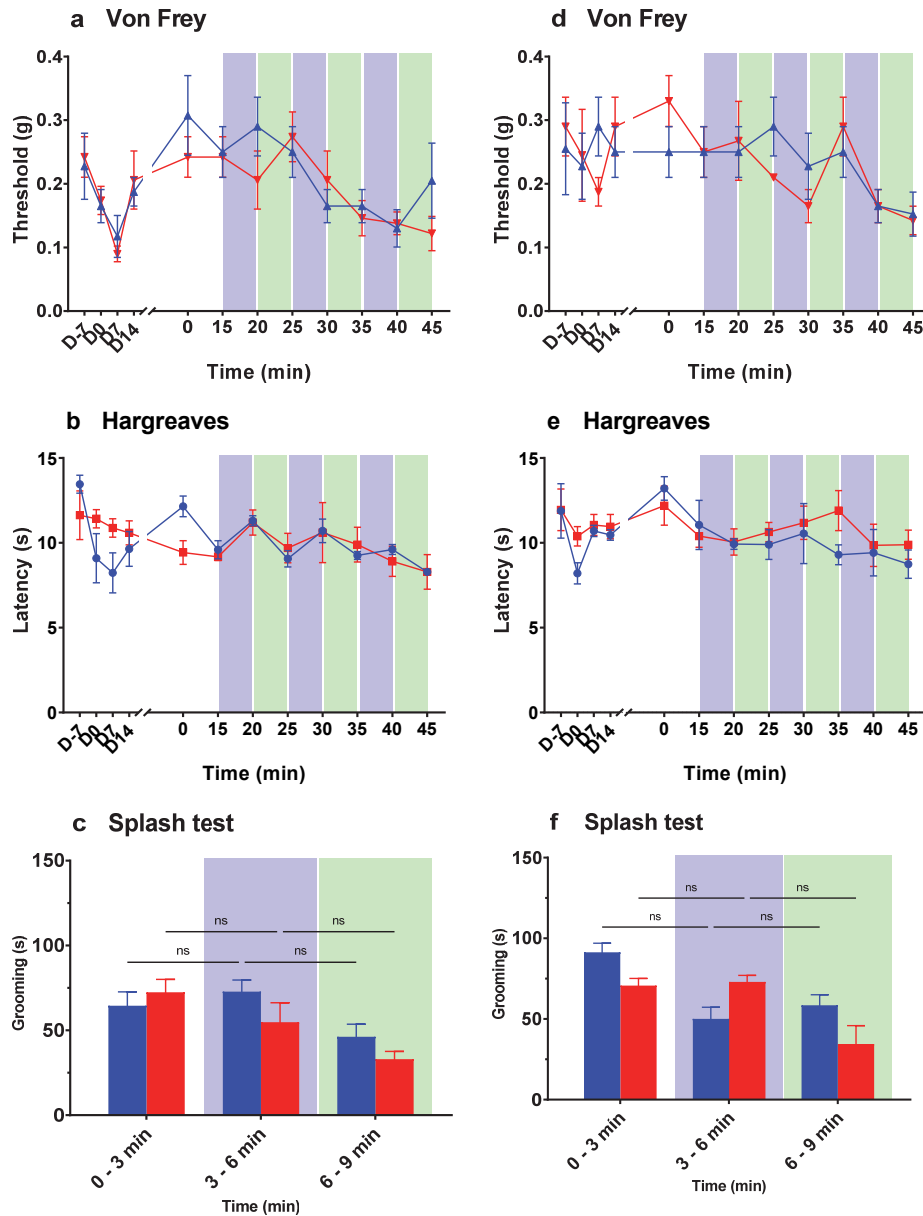

687

688 **Supplemental figure 4: Photopharmacological manipulation of mGlu4 in right or left**  
689 **amygdala does not modify mechanical sensitivity, thermal sensitivity or grooming in**  
690 **Sham animals.**

691 **a-f:** Females, sham left hindpaw, Vehicle (500 nL PBS, blue) or LSP4-2022 (5  $\mu$ M, 500 nL in  
692 PBS, red) delivered unilaterally in ipsi or controlateral amygdala. **a, d.** Von Frey. Mean  $\pm$  SEM,  
693  $t_x$  vs  $t_0$  (0 min), two-way ANOVA, Dunnett's post-hoc test. **b, e.** Hargreaves. Mean  $\pm$  SEM,  $t_x$   
694 vs  $t_0$  (0 min), two-way ANOVA, Dunnett's post-hoc test.. **c, f.** Splash Test. #  $t_x$  vs  $t_0$  (0 min),  
695 two-way ANOVA, Tukey's post-hoc test.

696

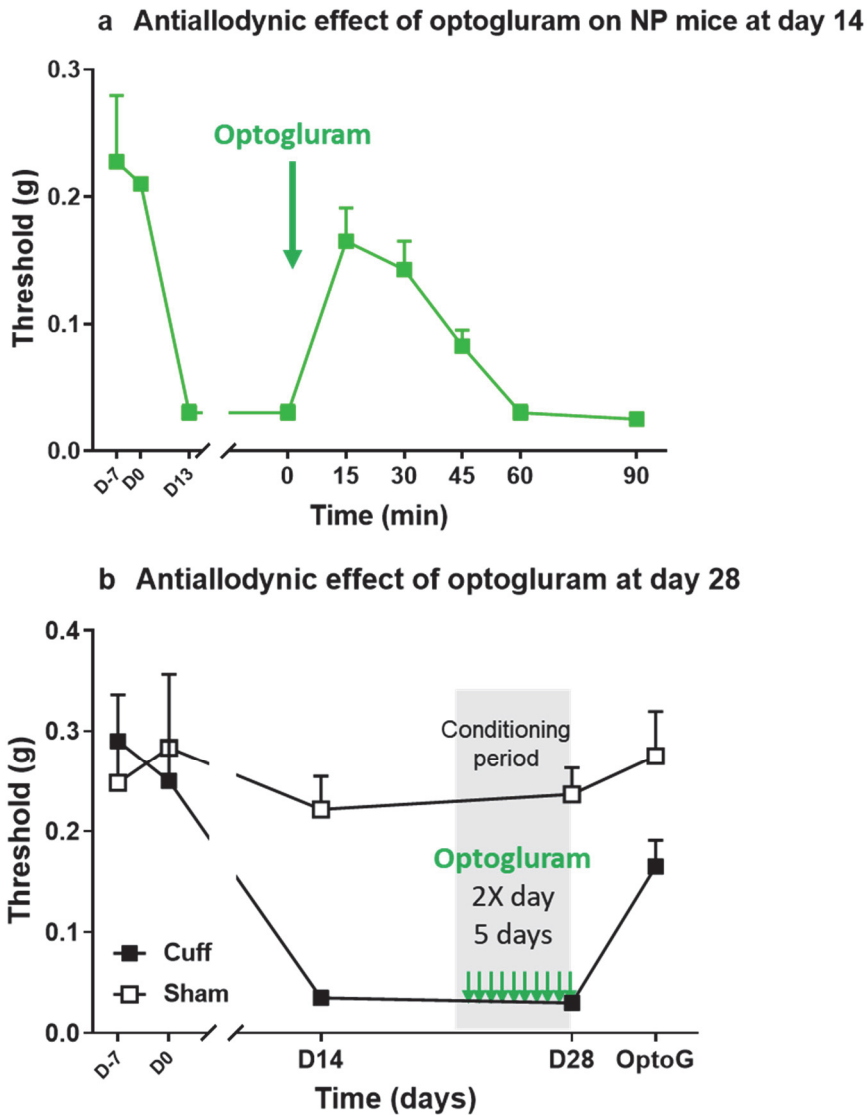

697

698 **Supplemental figure 5: No tolerance following 5 days of chronic treatment (twice daily)**  
699 **of optogluram (30 $\mu$ M) during the conditioning period.** Testing of aCPP 15 minutes  
700 following intra-amygdala injection of optogluram on day 6

701

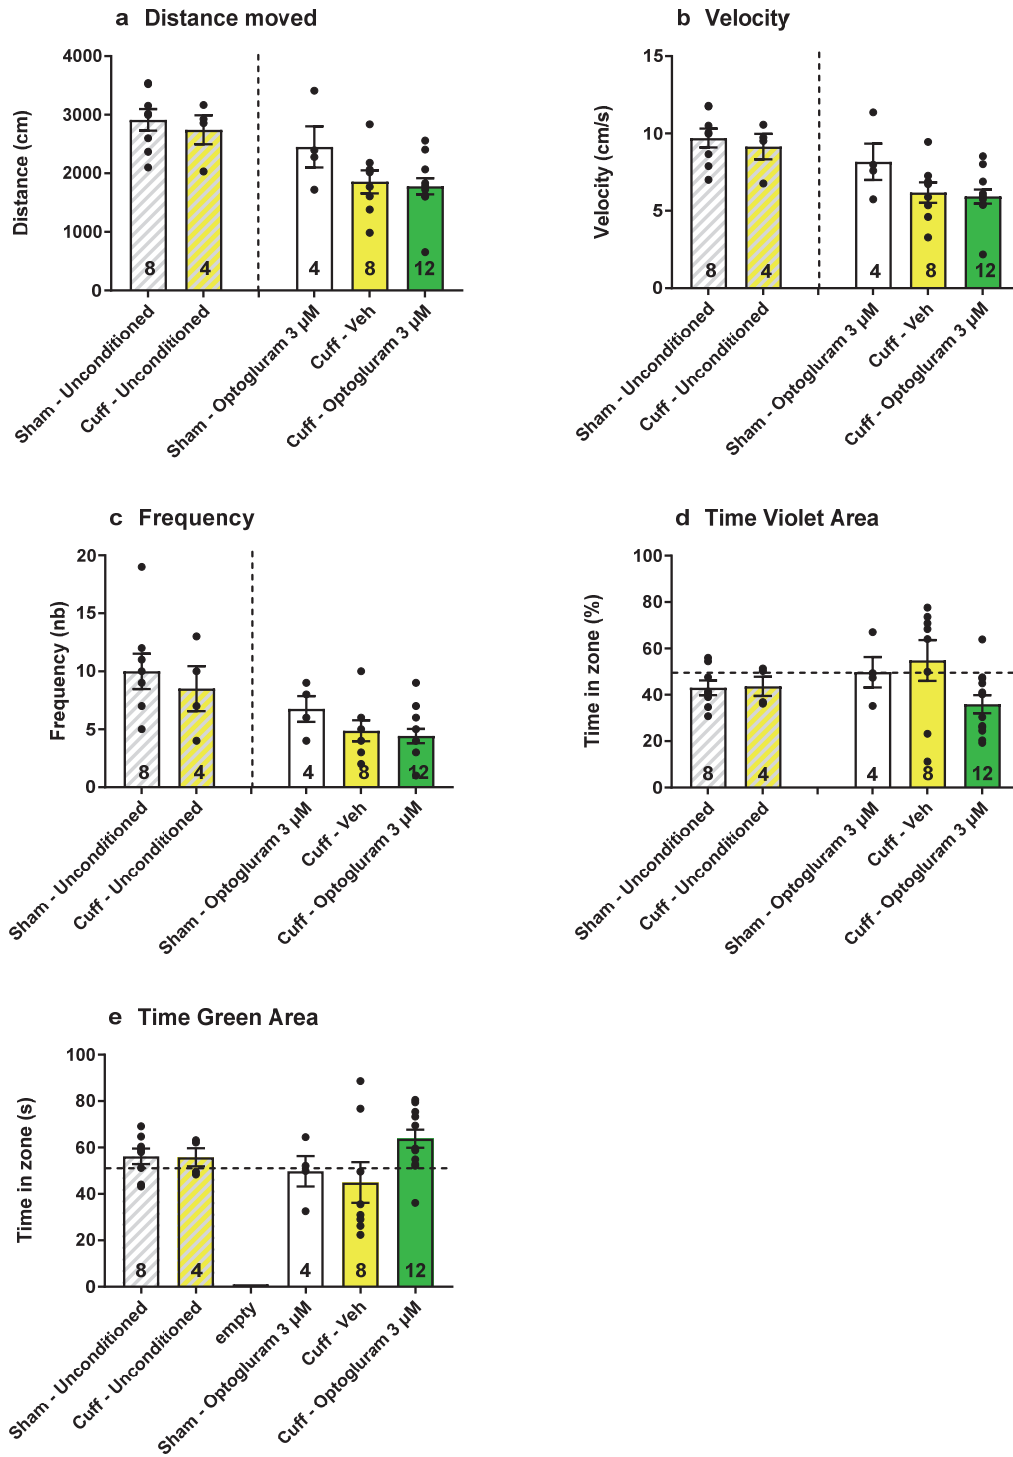

702

703 **Supplemental figure 6: aCPP: different behavioural parameters on non-conditioned and**  
704 **conditioned Sham or neuropathic mice**

705

**Non conditioned:**

**a**

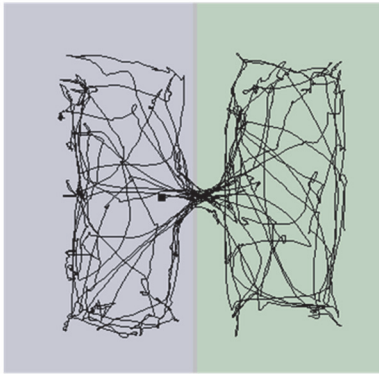

Sham

**b**

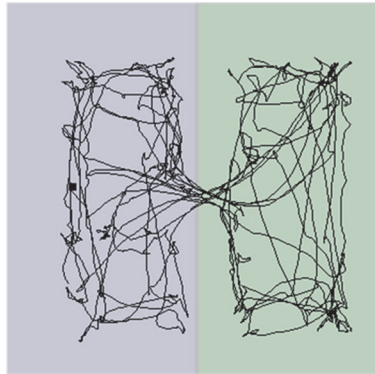

Cuff

**Conditioned:**

**c**

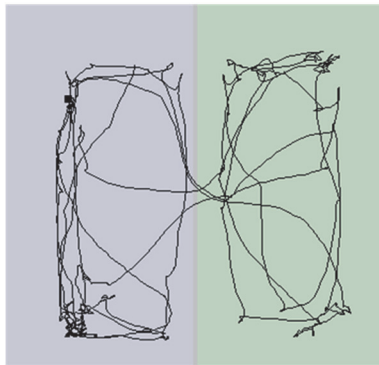

Cuff / Vehicle

**d**

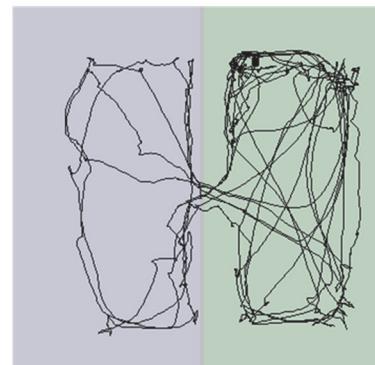

Cuff / Optogluram

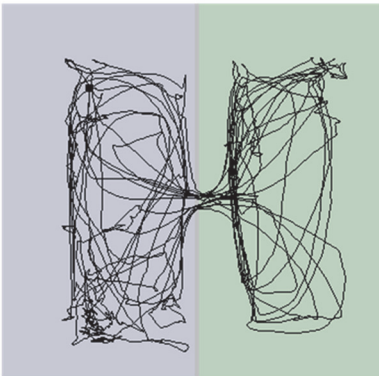

Sham / Optogluram

706

707 **Supplemental figure 7: aCPP: Examples of videotracks on non-conditioned and**  
708 **conditioned Sham or neuropathic mice**

709

710
